# Supplementary material for: Ultrasound-Assisted Extraction May Not Be a Better Alternative Approach than Conventional Boiling for Extracting Polysaccharides from Herbal Medicines
Source: PubMed Central journal article supplement (PMC6274063; doi:10.3390/molecules21111569), 2016-11-18
Supplement: molecules-21-01569-s001.pdf [file molecules-21-01569-s001.pdf]

# Supplementary Materials: Ultrasound-Assisted Extraction May Not Be a Better Alternative Approach than Conventional Boiling for Extracting Polysaccharides from Herbal Medicines

Ka-Man Yip, Jun Xu, Wing-Sum Tong, Shan-Shan Zhou, Tao Yi, Zhong-Zhen Zhao and Hu-Biao Chen

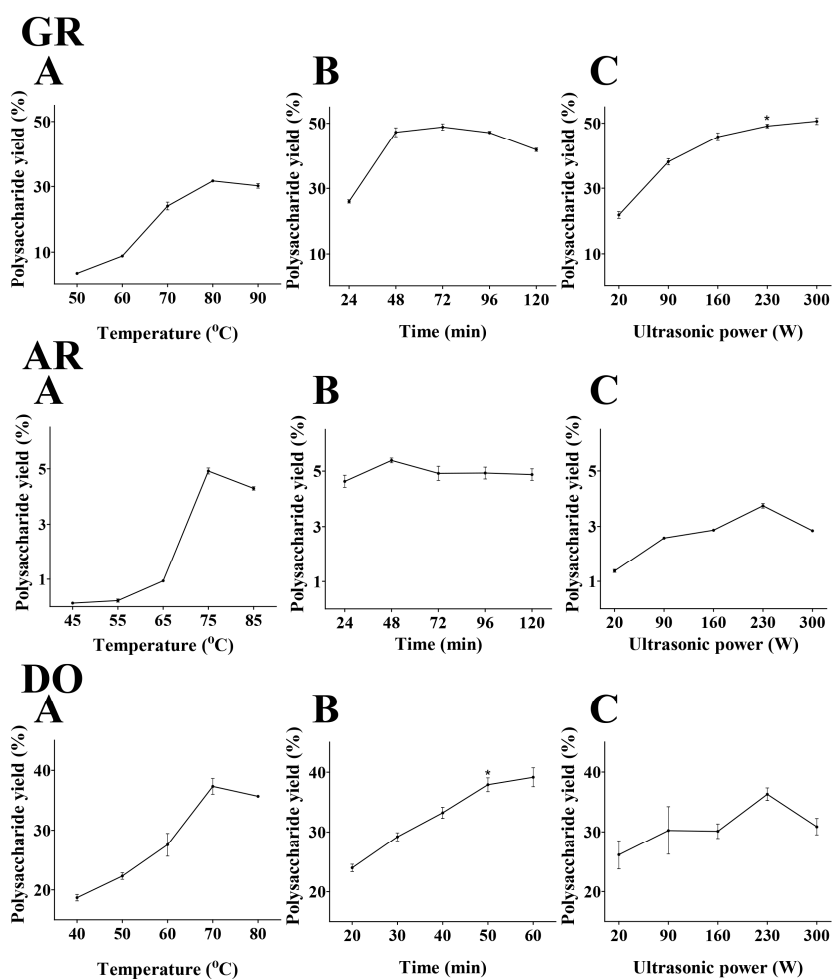

**Figure S1.** Effect of different temperature (A); extraction time (B) and ultrasonic power (C) on the polysaccharide yield in the herbal samples by single-factor test.\*  $p < 0.05$ , compared with the previous one.
